# Supplementary material
Source: Springer Nature journal article supplement (https://www.springerprofessional.de/resource/supplementary/13638_2013_993_MOESM3_ESM.pdf/11899132)

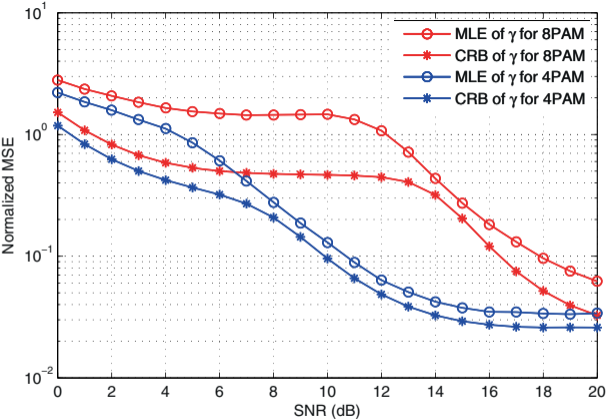

(a) M-PAM

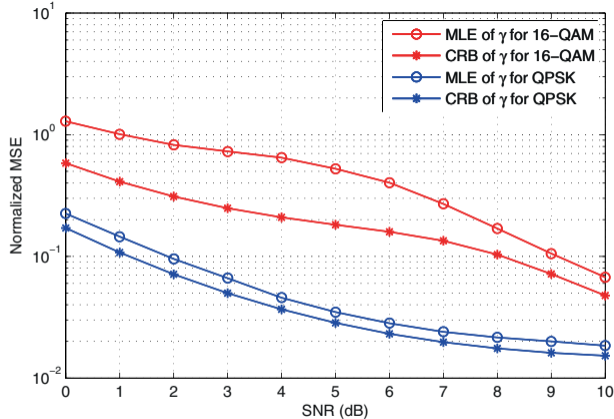

(b) M-QAM

Supplement: MOESM3 [file 11899132]
